# Supplementary material
Source: PubMed Central journal article supplement (PMC4496608)
Supplement: IAI.03067-14_zii999091319so1.pdf [file IAI.03067-14_zii999091319so1.pdf]

| Name       | Sequence of alignments                                        | Length (AA) |
|------------|---------------------------------------------------------------|-------------|
| TRAg_16_TR | ----WNNWLKEMK---ISLTEKLEKES-QEYMEKLEQQWDEFM-KNSEDKWRHYNPQME-  | 126         |
| TRAg_29_TR | ----WDAWLKGTKKDYENLKCFAKGNL-YDWLCSVRDSFELYL-QSLESKWTSCSDNTT-  | 174         |
| TRAg_32_TR | ----WYTWLKGTKKDYETLKCFAKGNL-YDWLCNVRESFDLYL-QSLEKKWTTCSDSAT-  | 175         |
| TRAg_30_TR | -----WLKDTKDEYENLKCQYRTCL-YDWRKINDEYNELL-NKLEEKWAKFPNDPK-     | 175         |
| TRAg_31_TR | ----WDDWLKSNKKDYANCKCEVRVNL-YDWFCKQSDLELNDSIYKNLEEKWSGFSKDE-  | 174         |
| TRAg_14_TR | ----FKNWLNLEKEYDAWKVSLVNDN-NEWILKKNEIFENIL-NRIKEKWESWNIYTL-   | 686         |
| TRAg_1_TR  | KEEAWDHWLTVLEPEWVTFNSFIEQKK-KRWIQKKEEDWSIWI-KDMEHKWVNYKKKKD-  | 153         |
| TRAg_15_TR | ----WLTFIQGLEGDWERLEVSLNKAR-ERWMEQRNKEWAGWL-RLIENKWSEYSQIST-  | 1246        |
| TRAg_28_TR | KIKDWNQWMKQAKKDFSGYKGTMTQR-HEWTKEKEDELQKFC-KYLEKRWMNYTGND-    | 197         |
| TRAg_13_TR | ----FSNWLKKAEDWKEFHVVLEDER-TKWWANLGDLEKQWF-ETAEEKWNNYNPGLD-   | 173         |
| TRAg_20_TR | ----WKKWINNTEKQWGNFTQSFEQHK-QKWNKKESEWEEWL-TNIHYNWIGFTNKLE-   | 426         |
| TRAg_27_TR | ----WSEFLKSVGDGDFKEFLVLDNEK-NSWLEGGKDELWEQWK-ANMEKKWEHYDEYTF- | 115         |
| TRAg_34_TR | ----WHEWMDEVQMDWKEFNSSLESEK-NKWFQKKEKEMMELI-KSIEDKWLDNFENMH-  | 113         |
| TRAg_21_TR | ----WHNWLKLEEDWDSFSTSLIRDK-KDFMKIKTDELNGWL-NLEENKWNNSFGYLS-   | 110         |
| TRAg_7_TR  | ----WKYEMENVEEEWQLLNLEWIEEEK-QNWIESKDKELNWM-NKMENKCMHID-NIN-  | 230         |
| TRAg_24_TR | ----WGEWQLTFEEEFQNFLLSLENN-SDMLQEEKNEWDYWI-EKMQNKWSRPHGIMS-   | 121         |
| TRAg_3_TR  | -----WMVKLEGEWKDFASLENEK-IRWIQEKEKEWDEWL-EIMQEKWTHYDRNLN-     | 110         |
| TRAg_18_TR | INPEWQNWMQDLKNEWSRYNAYIHKER-NKWFQKKEEFHKKFI-EDFQFKWMHYNKELL-  | 2490        |
| TRAg_26_TR | ----WDNWKTRLEEDFNEFYFSLDKEK-KEWIEEKEGEWEKLI-HEMGNKWTPEKGFND   | 147         |
| TRAg_36_TR | ----WNKWLKLEDNWKQFNLSLIKEK-NEWIQNVTKDWNWEM-QNMQHKWTHYIENMD-   | 110         |
| TRAg_33_TR | ----WDNFMKETERDWEKFNSTSMENLT-SSWFQKKELEWEGWI-KAMQNRWAYYNKNMDD | 82          |
| TRAg_12_TR | ----WKEWIKKAESDLDFINALMDNEKEKKWYSEKEKEWKNWI-KGVEKKWMHYNKNIY-  | 233         |
| TRAg_22_TR | ----WNKWMRQLEEQWHFYFITLETKT-NDWMKQKEEFNTWL-TEMENKWMSYHNHLD-   | 537         |
| TRAg_10_TR | ----WENWMARLELDWKHFDNSIKSKK-EKWLEERVHSWEEWL-KQIEDKWEHYNAHMD-  | 146         |
| TRAg_4_TR  | -----WKSFDQMENER-KQWLEKKDAEWKWK-KYTEIKYMSYCVDIN-              | 145         |
| TRAg_11_TR | ----WSNWLKLEQDWKVFNEKLQNEK-KTFLEEKEEDWNTWI-KSVEKKWTHFNPMD-    | 144         |
| TRAg_23_TR | ----WNNWFMKLQSDWKYFNALSALENEK-QTWFDKEKEWQEWL-KSMENRWTHYENMD-  | 149         |
| TRAg_17_TR | KKCAWNNWMMRLESEWENFNSTSMKSKK-NVWLQETEQEWEWI-KQMENKWMNCNENIN-  | 146         |
| TRAg_5_TR  | ----WNNWMLRLESWKFHNDVVEEAK-TKWLHERDSAWSDWL-RSLQSKWSHYSEKML-   | 144         |
| TRAg_9_TR  | ----WKAWMEQLDKDAEIFTTSLEHKK-DQWLVRLEWGDWV-KSMEEKWNHYNEKMG-    | 147         |
| TRAg_2_TR  | ----WTDWMVQLDDDWKDFNAQIEEEK-KAWIEEKEGDWVILL-KHLQNKWLHFNPNLD-  | 147         |
| TRAg_6_TR  | ----WNIWKKKNEEWWKIFNTSIENEK-DTWLQGIKEWQELL-EAMQNKWIHYNKMD-    | 279         |
| TRAg_25_TR | ----WNNWLIKTEEDWKLFNSTSVENKK-NRWLEKRDKELEVWL-MNMQNRWLHYRENEE- | 521         |
| TRAg_19_TR | ----WYMWKKLNSSWEEFNSSVENGG-RKWLNVNKDKDWEDWL-KVMEKKWMHYNERME-  | 423         |
| TRAg_35_TR | ----WKNWKIGLEEDWEAFHDAIQNEK-NKWFEGIEKEWENWM-KTMEQKLNKFNSEHIN- | 146         |
| TRAg_8_TR  | ----WKNWGMKLEGEWVDFNNTIEKEK-GKWLNGKEKDWDEFI-QYMDNKWMHYHDGLD-  | 144         |
| TRAg_16_TR | -----EEYQCSVYPLGLKWDD-EKWTAWF                                 | 149         |
| TRAg_29_TR | -----TVFLCECLAESSGWGD-PQWESWV                                 | 197         |
| TRAg_32_TR | -----TLFLCECFAESSGWND-SQWGNWM                                 | 198         |
| TRAg_30_TR | -----NKDVFDNLKTSSLKND-EKKAQWM                                 | 198         |
| TRAg_31_TR | -----LSAGLSGSSSWTN-EQWAEWM                                    | 194         |
| TRAg_14_TR | -----KDINDDVIRLKDLDTE-EQWSKWL                                 | 709         |
| TRAg_1_TR  | -----RKYLSKYRDGTLNCSE-REWNVKM                                 | 176         |

|            |                                                              |      |
|------------|--------------------------------------------------------------|------|
| TRAg_15_TR | -----KGKDPAGLRKR-EWSD-EKWKKWF                                | 1268 |
| TRAg_28_TR | -----RECRSDFLKSTQNWNE-SQWNKWV                                | 220  |
| TRAg_13_TR | -----LEYKSNILKKAKVWKE-GQWKWEI                                | 196  |
| TRAg_20_TR | -----GDYINDKVNAWTKWGE-KEWKGII                                | 449  |
| TRAg_27_TR | -----KELLADHAKDALTWND-KEWINWV                                | 138  |
| TRAg_34_TR | -----EVLNYAILKISLMWSF-SEWQKWI                                | 136  |
| TRAg_21_TR | -----DGYKNYLLKKSEKWND-ADWENWA                                | 133  |
| TRAg_7_TR  | -----KEYQCMFIKSKLGDDQSQIKEQL                                 | 254  |
| TRAg_24_TR | -----ESYKSYIYNKSATWTE-ADWKTWI                                | 144  |
| TRAg_3_TR  | -----PTYKNYILKKSSEWDN-FDWEYWA                                | 133  |
| TRAg_18_TR | -----EDHSFDVYKSLKWQD-SKWIKWI                                 | 2513 |
| TRAg_26_TR | -----RAHLSDSLEGSSTWND-SQWEDWI                                | 170  |
| TRAg_36_TR | -----ESHKSHILEKSLTWNN-ADWENWV                                | 133  |
| TRAg_33_TR | CVLNVIKNSLNWTFQWQKWI RLMKNKAMKHFESSGDEYILDVFRRNTSWTT-EQWKWEI | 141  |
| TRAg_12_TR | -----VEYRSLVFWVGLKWVE-SQWEKWI                                | 256  |
| TRAg_22_TR | -----TEYNTNLYKKYLTWDE-TDWKTWI                                | 560  |
| TRAg_10_TR | -----MSYKFYIFKISSAWNQ-SHWEQWA                                | 169  |
| TRAg_4_TR  | -----NEFESNTLKDSSTWNR-NQWEDWI                                | 168  |
| TRAg_11_TR | -----KEFHTNMRRSINWTE-SQWREWI                                 | 167  |
| TRAg_23_TR | -----AKFKSYILKNSQGWDD-NQWETWI                                | 172  |
| TRAg_17_TR | -----DEYKDYLIKSKSATWTD-EEWKWEI                               | 169  |
| TRAg_5_TR  | -----KEHKSVMKESANWND-TQWGNWI                                 | 167  |
| TRAg_9_TR  | -----SEYYSVIYKNTSAWSD-EQWENWI                                | 170  |
| TRAg_2_TR  | -----AEYQTDMLAKSETWDE-RQWKMWI                                | 170  |
| TRAg_6_TR  | -----AEYQINILEKSSQWDD-TQWVEWI                                | 302  |
| TRAg_25_TR | -----NEYKAEAMKNSSTWDD-SQWEQWI                                | 544  |
| TRAg_19_TR | -----REYKSDLFERSADWDD-QQWEEWI                                | 446  |
| TRAg_35_TR | -----NTYPSITLTKKYDLDE-SHWEQLI                                | 169  |
| TRAg_8_TR  | -----EEVKS DILKRSLTLDE-IEWKDWI                               | 167  |

---

|            |                                                               |      |
|------------|---------------------------------------------------------------|------|
| TRAg_16_TR | YEKGLWCLKKSFKTWLTDSSKKGYNTYMKNLLQEFGKQFYEDWCRRPEKRREDKICKRWGQ | 209  |
| TRAg_29_TR | KKELKEQLKTEAQAWISTKKKDFDGLTSKYFSLWKDHRRKELEEEAWK-----         | 245  |
| TRAg_32_TR | NNQLKEQLKTEAEAWISTKKKDFDGLTSKYFSLWKDHRRKELEDAEWK-----         | 246  |
| TRAg_30_TR | RKNLKDLMREQVDEWLEGGKKIYEGMSPTYWDAWEKKIAKGLMGAAW-----          | 245  |
| TRAg_31_TR | RNNLKGKLEDEVKSWLAGKQKGYDAVRDTCFNQWKEGRKGALAPDVWS-----         | 242  |
| TRAg_14_TR | DAQWKPYNKQTFWDLIDSYEKLYHQWKRTHWDKWKSRKMTIEWISQEWKVDEEEKWAQWES | 769  |
| TRAg_1_TR  | KREVEAAMIADYKKWMRDAEENLQKWI SKDLDIWKKKKFDEWLKVEWKKEEDAHWSKDSN | 236  |
| TRAg_15_TR | KAEVKSQIDSHLKKWMDTHSNLKFILVKDMSQFENKKTKEWLMNHKKNERGYGSESFE    | 1328 |
| TRAg_28_TR | KSEGKHHMNKQFQKWLVDYNYKYLQDWTNTEWKNKKTTVKEQLDDEEWK-----        | 268  |
| TRAg_13_TR | DKSLKKYITDDFKKWMMDGHQENLNAALSVNWETWKRQKLECNVSGWRLKEDKHWRWTF   | 256  |
| TRAg_20_TR | EMEWKRPMKVWTKLVEKNEKIWGDKLFNYWDNWKDKKWNWKNMNNWKKKEEKWNNSE-    | 508  |
| TRAg_27_TR | SKKGRLAMKGDWKNWVNGHDVFFKDGINNDWKNWSDFKRKEFGSITWKYREDKFWTYWID  | 198  |
| TRAg_34_TR | NKDGKRIENQWERWTISNKNLYYKIIMKEWFKWKNKKIKQWLKRNWLHHEGRILENWER   | 196  |
| TRAg_21_TR | NTEMVAHLKDYHLWSLNTERSVNALVRGEWNQWQHDKMSSWLSDDWKKVGMAMYWDLQES  | 193  |
| TRAg_7_TR  | KHELKNFIYRDWKKWLRENESYLNLTWLVKQWIQWKNKIKFLMAEWKQEEDEYWNDEWK   | 314  |
| TRAg_24_TR | HTDWKDYMEIDWHRWINDVEYDLDKLIDERWEQWKTHQIMTWLMSNWTDEEQQYIDKLEF  | 204  |
| TRAg_3_TR  | NTEWHELMEKDWKNWIYGNKLSLNKIIDNKWINWSNEKMAEWLIQELNDEEGSDTQTNI   | 193  |

|            |                                                                |      |
|------------|----------------------------------------------------------------|------|
| TRAg_18_TR | EKDGESIMMMMEKWKIDKVKSEYDLWLLKDWEQWKTNKIMDWLLSEKKCDQYQYWLKWEY   | 2573 |
| TRAg_26_TR | RTKGSQLEMEIEWENWIDEKDSLNFEMILKKWIQWKNSKIM-----                 | 210  |
| TRAg_36_TR | NTELKGLIDNEWQNWINQIESQRYTWIEDKQVHRSYQILTWLKSQDWHKHDENICWLRKEY  | 193  |
| TRAg_33_TR | KTPIRESMEKDWEYWIAEDQYKLDNWMLENFQDKWTKRITWKEKKWKAEEDEYWANWEA    | 201  |
| TRAg_12_TR | LSDGLEFLVMDWKKWIKENKSNFDEWLKSEWDTWTNSQMEEWKSSNWKLNEDEKRWEMWEN  | 316  |
| TRAg_22_TR | KTVGKRLIEEDWVKWINDHECKLNEWFNGDWNQWKS LKNFNWEMNEWKSDEYERWAEWQN  | 620  |
| TRAg_10_TR | KAELKYFIDREWHNVVYQNEQHLNNWITNEWSEWKNHIIAAWLTKNWKLSENAYWEKMAK   | 229  |
| TRAg_4_TR  | TTVGKEMIKSEYEKWIYENENYLDEWVKREWVEWKQKNISSWLSSEWKCKEDDSWSKWEQ   | 228  |
| TRAg_11_TR | QTEGRLYLDIEWKKWFFENQSRLEDELIVKKWIQWKDKIINWLSMDWKRAEQEHWEFEE    | 227  |
| TRAg_23_TR | KNDGKKFMETNYHKWIDENYSNYNAVWVKRWEQWKNEKILTWLLKDWRRNEFEYWKFKN    | 232  |
| TRAg_17_TR | KTEGKNFMKTDLKWKIKAKETS LDDLLEWVQWKNEKIMAWLLSEWKTEEDTYWSQWEH    | 229  |
| TRAg_5_TR  | KTEGRKILEAQWEKWKIKGDDQLQKLILDKQVQWKNDKIRSWLSSEWKTEEDYWANVER    | 227  |
| TRAg_9_TR  | NTEAKQLMEIDWSDWISSESYVDVMMVKEWIVWKNKIMEWIMRDWKCKEDEQWDAWEK     | 230  |
| TRAg_2_TR  | STEGKQLLEMDLKKWFTNNEMIYCKWMTDEWNEWKNEKIKEWVTSEWKESEDQYWSKYD-   | 229  |
| TRAg_6_TR  | KTEGKQFMEQWQKMWLAQKEAHLNNVWVNEWIQWKNSQIMEWLT TDWRLQKEASWSNYEN  | 362  |
| TRAg_25_TR | KTEGKKGMEADLKKWLNKETF LLDGWI SKEWVQWKNERMLQWLSVDWKHKEDETFEHYKS | 604  |
| TRAg_19_TR | RTEGEQFMELDWKKWMYENKFLDDWASKWAKWKKDKIMSWLLSDWKLTEQKYWDDWEN     | 506  |
| TRAg_35_TR | KSEKQLMEIEWNNWIYHHESFLNVWCLKAWLKWKNDKIVQWLQKDWKLEKEDAYQNW-     | 228  |
| TRAg_8_TR  | KTEGKELMEKDWKNWITNNESYLDVWSVKEWLKWKQNRIVTWIMTDWKCEEDEYWSKWE-   | 226  |

---

|            |                                                                |      |
|------------|----------------------------------------------------------------|------|
| TRAg_16_TR | KGLR-N--DNYYSLKWMQWR-NWKNRNHDQKHVVVTLMKDALKEYTGP-EFKLWTEFRKE   | 264  |
| TRAg_29_TR | -----TKASSGGLSEWEELTDKMNTRYTNN-LDNMWSNYSGD                     | 281  |
| TRAg_32_TR | -----NKVSSGGLSEWEELTNKMNTRYRNN-LDNMWSHFSD                      | 282  |
| TRAg_30_TR | -----YKMNSSGRTEWDKLRNELETRYNKK-IKSLWGGFHRD                     | 282  |
| TRAg_31_TR | -----KSQSDGKSSWDKLVDDLRRHTNK-TDFLWKAYQKD                       | 278  |
| TRAg_14_TR | -QKW-E--KYFQRKEKKEWI----ERNEIEISIRDWLKEKESMPVQCDGWLEWDTWKQE    | 821  |
| TRAg_1_TR  | -TPYGD TMNPLFSVLKKS YD-MYTARKKREKEHWNKLTENIGKTLTNK-KYVDWENMKMT | 293  |
| TRAg_15_TR | VMTT-S--KLLNVAKSREWY-RANPNINRERRELMKWFLLEKENEYLGQ-EWKKWTHWKKV  | 1383 |
| TRAg_28_TR | -----KKEAAGTKEWIKCTDKMEKCLKK-TKKHCKNWEKK                       | 304  |
| TRAg_13_TR | FSPNID--DIPVPKEFKALYENWKVRRKAETDQWKEWTDRIEKRVIFK-DTPAWTKWKND   | 313  |
| TRAg_20_TR | -----KRKDLNKDENWK-EWKKRLLREKKEWENWVNEKEDFLMDS-EETHWEKWKKEY     | 558  |
| TRAg_27_TR | HGKP-S--EPMFVIKMEMFK-KWQDRLKNEEEESNWLDEKQKKYIDV-EWDKVVQWKKE    | 253  |
| TRAg_34_TR | -LPY-T--KILAMSEKKPWF-NSNAQVINERDYFLIWKKKEDFLVNE-ERDKWENWEYY    | 250  |
| TRAg_21_TR | -RNWAS--YSHTDDMKEHWI-KWNDRNARENIEWSKWVQNKYFIMYA-RHSDIEQWKYD    | 248  |
| TRAg_7_TR  | TETW----KWLHFYKRRKQW-TWKNRVTSEKQEWENWVKIKEERVIYN-KYKKWTQWINA   | 368  |
| TRAg_24_TR | -----G--KYSNKKEMEHFVKRWNKIIQWKTEKESWIQDKEGFITNI-KNEKWLQWKDD    | 256  |
| TRAg_3_TR  | -----G--KSSSSEENDEYLSLNDKIFSKNEEWEHWTDRKEKLIKKI-KNSNWSEWKNN    | 245  |
| TRAg_18_TR | SN---E--KTSLRKERIDWY-KWKKIRQSEAKWQKWVREKDQALLEV-KNAIWLNWKED    | 2626 |
| TRAg_26_TR | -----RENEMAKMERE                                               | 221  |
| TRAg_36_TR | -IEW-N--KPSKVRNTGGWL-KWKERIYKQSLWLYVWVQNKKEIIQNI-KCSGWIRWKDD   | 247  |
| TRAg_33_TR | KGSK-D--KSKVLIDRKNWN-LWKERTYREERQWEMYTERKKKEFFSK-DVVEWMKWKSE   | 256  |
| TRAg_12_TR | DKKW-I--KWLYLKDWINCS-KWKKRIQKESKEWLRWTKLKEEMYKNK-YGDKWKEWRTD   | 371  |
| TRAg_22_TR | -GNL-T--LWLNKKKKKKYL-TWKNRIEREKSEWDSWVRKDDLTLS-KTCKWIKWKNE     | 674  |
| TRAg_10_TR | -KKW-V--KSLFRVVRKNWL-KWKERIDREFQQWDEWVVGKQHLTYTNNHEWDAVWKWTD   | 284  |
| TRAg_4_TR  | -TVW-G--KWLFTENREKWT-AWKERTLRERAEWLKWVQLKEYVYIND-EWIPWTKWKNE   | 282  |
| TRAg_11_TR | -KSWSS--KFFQIFEKRNYE-DFKDRVSDWEDWFEWVKRKNDFITN-VLDQWIKWKEE     | 282  |
| TRAg_23_TR | -MTL-P--EPLYERAKNNWN-KWNKRLSKEKEQWKKWVAAKYELYENS-ECKQWKKWKDD   | 286  |

|            |                                                              |     |
|------------|--------------------------------------------------------------|-----|
| TRAg_17_TR | -STW-L--KWLNLTKKKHWL-KWKERNHREGEQWSTWLHVKENVYIFS-EWNNWSIWKNE | 283 |
| TRAg_5_TR  | -ATT-A--KWLQBAEKMHWL-KWKERINRESEQWVNWVQMKEVYINV-EWKKWPKWKND  | 281 |
| TRAg_9_TR  | -NKW-S--KWF SINERKKWT-QWKDRLSKETEETAWVENKEKQYLDN-EDRKLVEWKKN | 284 |
| TRAg_2_TR  | -DAT-I--QTLTVAERNQWF-KWKERIYREGIEWKNWIAIKESKFVNA-NWNSWSEWKNE | 283 |
| TRAg_6_TR  | -NKI-T--NMLQIKKRKQWN-KWKERINREREEDAWVRSKENIYINT-KWNKWSKWKKD  | 416 |
| TRAg_25_TR | -SKF-T--NVLHIKKKKKWT-KWKERTNKEKEEWNWVKGKENLYVNN-KWDKWLKWKKD  | 658 |
| TRAg_19_TR | -KAW-P--RFVYLDRDRENM-RWKERINREWEETSWVQDKDKVFNNA-KWVGWSKWRDD  | 560 |
| TRAg_35_TR | -KMW-R--LVGNPTDRTNWL-KWRKRNDNQIIEWNLWVTTKEKLYINH-KWDKWINWKND | 282 |
| TRAg_8_TR  | -ESW-A--KSPNMHDRTNWL-NWRERLNKEMVQWNSWVMMKEQQIREN-RSNNWSKWKSD | 280 |

|            |                                |      |
|------------|--------------------------------|------|
| TRAg_16_TR | KIDFYKQWMQAFAEQWTQDKQWNTW----- | 289  |
| TRAg_29_TR | LLFRFDEWSPEVLEKWIENKQWNQW----- | 306  |
| TRAg_32_TR | LFFNFDEWAPQVLEKWIENKQWNRW----- | 307  |
| TRAg_30_TR | VYFRFKEWIEEVFNKWIENKQIDTW----- | 307  |
| TRAg_31_TR | TLFGTGEWAEELFNKWIENKQW-----    | 300  |
| TRAg_14_TR | KFQHLDDYLNSLKNQWLAEKKW-----    | 843  |
| TRAg_1_TR  | KSGWYNEW-----                  | 301  |
| TRAg_15_TR | KFFVFNSMCTTFSGKRLTKEEW-----    | 1405 |
| TRAg_28_TR | ANSSFKKWEQDFTKKWTSNKQWNSW----- | 329  |
| TRAg_13_TR | KTAAFEKWLAFTNKLVAQKQWNTW-----  | 338  |
| TRAg_20_TR | KWNYLNEWMKQMEVDWLKSKPWEVW----- | 583  |
| TRAg_27_TR | NNKKFIDWMEYFVEKWTSNKQWNVW----- | 278  |
| TRAg_34_TR | KNDFQTMDSFLSHW-----            | 266  |
| TRAg_21_TR | NYALYSTWRNDFINRWVSEKKW-----    | 270  |
| TRAg_7_TR  | KKPSINQWVESLADKCVNDSRWNTW----- | 393  |
| TRAg_24_TR | HYFLFNWRNDFIEDWISKKRWLLW-----  | 281  |
| TRAg_3_TR  | KYASFNQWRESFIKKWLRERQW-----    | 267  |
| TRAg_18_TR | KKNIFFSMLHFFINNWIAKKQWNVW----- | 2651 |
| TRAg_26_TR | NQ-----                        | 223  |
| TRAg_36_TR | KNKIFNQWKECFLNWIREEKW-----     | 269  |
| TRAg_33_TR | KTEMFENWKENTLSTWIKKQWNVW-----  | 281  |
| TRAg_12_TR | KSIVYDDWKDDLAKRMIKKQWQVW-----  | 396  |
| TRAg_22_TR | KRLLFNDWVENFINTWISRKQWNSW----- | 699  |
| TRAg_10_TR | KYALVKEVRKSFVTKWVTEKQWRW-----  | 309  |
| TRAg_4_TR  | NRLAFIDWIGSFMNEWINNQWNEW-----  | 307  |
| TRAg_11_TR | KNLLYNNWADAFVTNWINKKQWVW-----  | 307  |
| TRAg_23_TR | REVLFNWIESFINTWVAEKKQWNVW----- | 311  |
| TRAg_17_TR | KEEFFYKWMEDTINWINEKRW-----     | 305  |
| TRAg_5_TR  | KKILFNKWSTNLVYKWTLLKQWNVW----- | 306  |
| TRAg_9_TR  | NYILFNKWMESFINKWIKEKQW-----    | 306  |
| TRAg_2_TR  | KRLEFNDWIEAFVEKWIRQKQWLIW----- | 308  |
| TRAg_6_TR  | KRFIFSKWVEMFTNKLISERQWKEW----- | 441  |
| TRAg_25_TR | KRALYSQKFLTFINKWISDKQWTVW----- | 683  |
| TRAg_19_TR | RRALFDDWMKPFIEKWINQKQWQVW----- | 585  |
| TRAg_35_TR | KNILFHEWMECFINKWIGEKKW-----    | 304  |
| TRAg_8_TR  | KHVMFNLMWDTFINKWINEKQWVW-----  | 305  |

**FIG S1** Sequence alignment of tryptophan-rich domain sequences of PvTRAg proteins. The sequence alignment of tryptophan-rich protein was analyzed by MUSCLE (MUltiple Sequence Comparison by Log-Expectation, <http://www.ebi.ac.uk/Tools/msa/muscle/>).

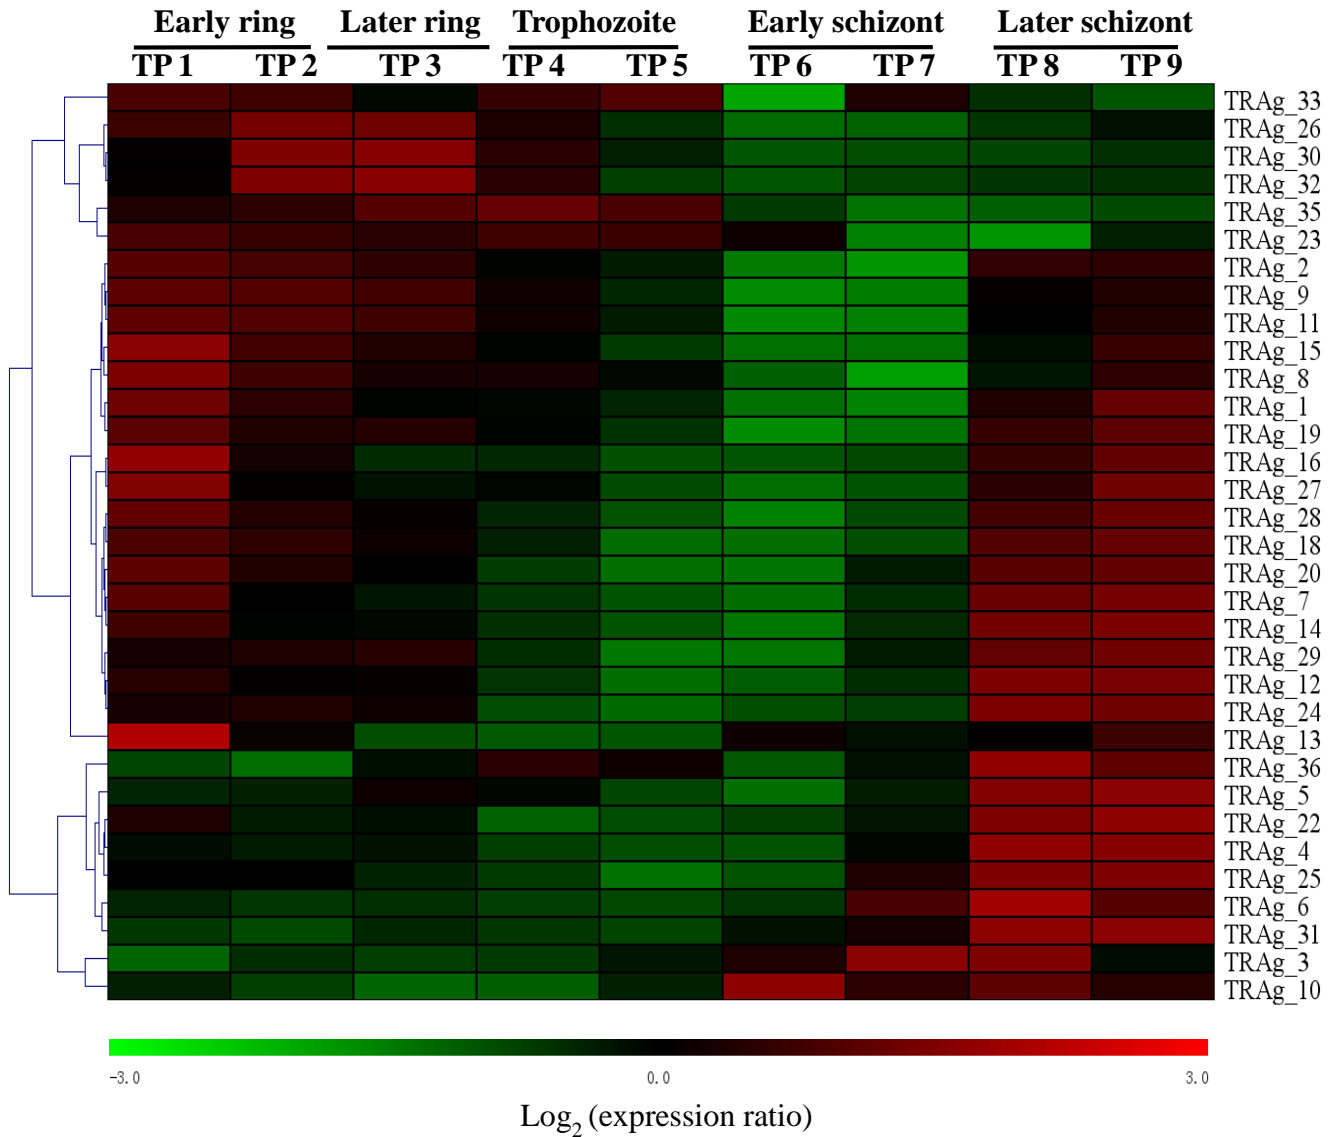

**FIG S2** Transcriptome of the PvTRAg proteins of blood-stage vivax malaria. Thirty-three genes with transcriptome data out of 36 total PvTRAg genes were used in the analysis. The transcription data of *P. vivax* genes were collected from published microarray results (1). TP1–9 represent gene expression data in *P. vivax* that were correlated with the expression level of PvTRAGs after 9, 13, 17, 20, 23, 29, 35, 40, and 43 h of cultivation of *P. vivax* parasites, respectively.



**TABLE S1** Summary of the expression region and geographic origin used for the construction of PvTRAg plasmids

| Name       | Gene ID | Chromosomal locations                  | Insert (bp)     | Insert (aa) <sup>a</sup> | Geographic origin <sup>a</sup> | Polymorphisms (aa) <sup>b</sup>                                         | References |
|------------|---------|----------------------------------------|-----------------|--------------------------|--------------------------------|-------------------------------------------------------------------------|------------|
| PVX_096950 | TRAg_1  | Pv_Sal1_chr02: 50,597–52,235 (+)       | 894 (88–984)    | 298 (A30–L327)           | Thai                           | N299D                                                                   | (2)        |
| PVX_096995 | TRAg_2  | Pv_Sal1_chr02: 110,463–112,049 (+)     | 1263 (181–1443) | 421 (K61–A480)           | Korean                         | Insertion of heptapeptide (GVAAAPG) at 332 aa                           | this study |
| PVX_002500 | TRAg_3  | Pv_Sal1_chr04: 41,747–42,706 (+)       | 762 (70–831)    | 254 (S23–N276)           | Korean                         | /                                                                       | this study |
| PVX_088810 | TRAg_4  | Pv_Sal1_chr05: 42,292–43,537 (+)       | 786 (292–1077)  | 263 (K98–E358)           | Korean                         | /                                                                       | (3)        |
| PVX_088820 | TRAg_5  | Pv_Sal1_chr05: 49,904– 51,215 (+)      | 780 (172–951)   | 259 (A58–V316)           | Korean                         | Q200P                                                                   | this study |
| PVX_088825 | TRAg_6  | Pv_Sal1_chr05: 53,924–55,652 (+)       | 1161 (175–1335) | 387 (F59–S444)           | Korean                         | D155G, Q160K                                                            | this study |
| PVX_088850 | TRAg_7  | Pv_Sal1_chr05: 78,993–80,676 (+)       | 1191 (184–1374) | 397 (F62–V457)           | Korean                         | S102I, K153E, L160N, V186I, E316K                                       | this study |
| PVX_090250 | TRAg_8  | Pv_Sal1_chr05: 1,263,606–1,264,574 (-) | 969 (4–969)     | 323 (M2–K322)            | Korean                         | K28N, N293S                                                             | (3)        |
| PVX_090255 | TRAg_9  | Pv_Sal1_chr05: 1,269,456–1,270,922 (-) | 978 (4–981)     | 326 (E2–N326)            | Thai                           | S191P, F237L                                                            | (2)        |
| PVX_090260 | TRAg_10 | Pv_Sal1_chr05: 1,273,169–1,274,463 (-) | 861 (181–1041)  | 287 (S61–V346)           | Korean                         | /                                                                       | this study |
| PVX_090265 | TRAg_11 | Pv_Sal1_chr05: 1,277,770–1,279,489 (-) | 978 (4–981)     | 326 (E2–K326)            | Thai                           | T43I, I45T, N63E, S74G, I80L, K88R, V272A, A293T                        | (2)        |
| PVX_090270 | TRAg_12 | Pv_Sal1_chr05: 1,283,152–1,284,624 (-) | 1068 (202–1269) | 357 (A68–E423)           | Korean                         | A92S, deletion of octapeptide (TKVADKTG) at 121-128aa                   | (3)        |
| PVX_090275 | TRAg_13 | Pv_Sal1_chr05: 1,288,045–1,289,739 (-) | 951 (70–1020)   | 317 (A23–V339)           | Korean                         | S71P                                                                    | this study |
| PVX_094305 | TRAg_14 | Pv_Sal1_chr08: 126,035–128,911 (+)     | 939 (1672–610)  | 313 (T558–K870)          | Korean                         | /                                                                       | this study |
| PVX_092990 | TRAg_15 | Pv_Sal1_chr09: 1,912,378–1,917,122 (-) | 870 (3376–4245) | 290 (D1126–V1414)        | Korean                         | Insertion of E at 1174aa, V1158I, H1380Q                                | this study |
| PVX_092995 | TRAg_16 | Pv_Sal1_chr09: 1,921,661–1,923,102 (-) | 1005 (73–1077)  | 335 (S24–A358)           | Thai                           | P36A, R45Q, S219A, W222L, Deletion of hexapeptide (KKKAAS) at 312-316aa | (2)        |
| PVX_097577 | TRAg_17 | Pv_Sal1_chr10: 1,335,857–1,337,016 (-) | 768 (181–948)   | 256 (S61–S315)           | Korean                         | Q240E, V264A                                                            | (2)        |
| PVX_097575 | TRAg_18 | Pv_Sal1_chr10: 1,339,589–1,348,572 (-) | 840 (7150–7989) | 280 (L2384–T2662)        | Korean                         | K2466E, M2525I                                                          | this study |
| PVX_115465 | TRAg_19 | Pv_Sal1_chr11: 27,493–29,676 (+)       | 804 (994–1797)  | 268 (S332–S598)          | Korean                         | S370G, K474E                                                            | this study |
| PVX_083550 | TRAg_20 | Pv_Sal1_chr12: 32,743–35,371 (+)       | 1650 (190–1839) | 550 (I64–S612)           | Korean                         | D82Y, K311E, T346A, M570V                                               | this study |



|            |         |                                        |                 |                 |        |                                                                                                             |            |
|------------|---------|----------------------------------------|-----------------|-----------------|--------|-------------------------------------------------------------------------------------------------------------|------------|
| PVX_121897 | TRAg_21 | Pv_Sal1_chr14: 68,269–69,280 (+)       | 759 (70–828)    | 253 (S24–N275)  | Korean | N60D                                                                                                        | (2)        |
| PVX_101510 | TRAg_22 | Pv_Sal1_chr14: 2,978,093–2,980,422 (-) | 1935 (214–2148) | 646 (K72–Y716)  | Korean | K88R                                                                                                        | (3)        |
| PVX_101515 | TRAg_23 | Pv_Sal1_chr14: 2,983,295–2,984,636 (-) | 963 (4–966)     | 321 (E2–S321)   | Thai   | K258E, D285G.                                                                                               | (2)        |
| PVX_101525 | TRAg_24 | Pv_Sal1_chr14: 2,992,657–2,993,679 (-) | 786 (79–864)    | 262 (H27–N287)  | Thai   |                                                                                                             | (2)        |
| PVX_112655 | TRAg_25 | AAKM01000025: 23,247–25,581 (-)        | 1905 (175–2079) | 635 (S59-L692)  | Korean | S277N                                                                                                       | this study |
| PVX_112660 | TRAg_26 | AAKM01000025: 28,035–29,062 (-)        | 450 (178–627)   | 165 (P60–TC210) | Korean | D197N                                                                                                       | this study |
| PVX_112665 | TRAg_27 | AAKM01000025: 31,142–32,691 (-)        | 780 (88–867)    | 260 (D30–L288)  | Korean | T194K                                                                                                       | this study |
| PVX_112670 | TRAg_28 | AAKM01000025: 39,363–41,543 (-)        | 909 (100–1008)  | 303 (V34–K335)  | Thai   | E58G, Insertion of K at 59 aa, Insertion of tetrapeptide (EGAA) at 69aa                                     | (2)        |
| PVX_112675 | TRAg_29 | AAKM01000025: 45,585–47,015 (-)        | 843 (97–939)    | 281 (P33–K312)  | Thai   | V63L, D65E, Deletion of K at 68aa, D70G, N81S, G82T, L83I, K85N, I90V, K93N, V94L, K95N, E98A, L106P, L239F | (2)        |
| PVX_112680 | TRAg_30 | AAKM01000025: 49,982–52,248 (-)        | 846 (97–942)    | 282 (P33–K313)  | Thai   | K115R, A244E                                                                                                | (2)        |
| PVX_112685 | TRAg_31 | AAKM01000025: 56,111–57,670 (-)        | 861 (49–909)    | 287 (L17–K302)  | Thai   | G46A, K81E, Q150                                                                                            | (2)        |
| PVX_112690 | TRAg_32 | AAKM01000025: 60,987–63,052 (-)        | 855 (88–942)    | 285 (E30–K313)  | Thai   | Q37R, D66G, E258D                                                                                           | (2)        |
| PVX_112705 | TRAg_33 | AAKM01000025: 79,107–79,991 (-)        | 885 (4–885)     | 295 (K2–Y294)   | Korean | /                                                                                                           | (3)        |
| PVX_125728 | TRAg_34 | AAKM01000032: 6,128–7,093 (+)          | 753 (88–840)    | 251 (K30–S279)  | Korean | /                                                                                                           | (2)        |
| PVX_125730 | TRAg_35 | AAKM01000032: 9,260–10,694 (+)         | 816 (178–993)   | 272 (T60–K330)  | Korean | K312E                                                                                                       | this study |
| PVX_109280 | TRAg_36 | AAKM01000061: 5,896–6,877 (-)          | 774 (79–852)    | 258 (N27–Q283)  | Thai   | N59K, Deletion of K at 60aa                                                                                 | (2)        |

<sup>a</sup> Genomic DNAs and complementary DNAs were obtained from *P. vivax* isolates from Korea and Thailand.

<sup>b</sup> Positions of amino acid substitutions were compared with those of *P. vivax* Sal-I strain from PlasmoDB.

**TABLE S2** Summary of In-fusion primers for cell-free expression of PvTRAgS

| Name    | Forward primer (5' → 3') <sup>a</sup>          | Reverse primer (5' → 3') <sup>a</sup>            |
|---------|------------------------------------------------|--------------------------------------------------|
| TRAg_2  | gggcggatatctcgag AAAACCGAAACGGTGACCT           | gcggtaccgggatcc CTAAGCGGAGGTGGAGGG               |
| TRAg_3  | gggcggatatctcgag TCTCTTCAATATGAACAAATTGAACC    | gcggtaccgggatcc CTAATTTATCTGATTGTTAACCATTATTTTC  |
| TRAg_5  | gggcggatatctcgag GCGGCAGCTAATAGACCAAAA         | gcggtaccgggatcc CTAAACTTGGGGTGCAGTATTTG          |
| TRAg_6  | gggcggatatctcgag TTTCTCCCCACACTTGGAAA          | gcggtaccgggatcc TTATGATTTAACCATTCTTTCCATT        |
| TRAg_7  | gggcggatatctcgag TTCTTCAGTAAAAAGTCGAACAGACTC   | gcggtaccgggatcc CTACACACTAAGAGCATTTTCTCCTTC      |
| TRAg_10 | gggcggatatctcgag TCCGTTAATAAGAAAAAGAAGGACAT    | gcggtaccgggatcc TTAGACGGTTGACGGCCC               |
| TRAg_13 | gggcggatatctcgag GCTGCCCAAAGAAGGCA             | gcggtaccgggatcc TTAGACCCAGTTGGTCCACTG            |
| TRAg_14 | gggcggatatctcgag ACTGTATTTCGCATGGAGGGA         | gcggtaccgggatcc TTAATTGTCAGCTTTATCGTCAGC         |
| TRAg_15 | gggcggatatctcgag GATGTATTACAATTAGTAATACCATCGGA | gcggtaccgggatcc TCAAACTTTTATTTCATTAACAAATTGA     |
| TRAg_18 | gggcggatatctcgag CTTAACCTTGCAGATTACAAAGAATG    | gcggtaccgggatcc TCAAGTTTCTGACAGTTCCCTGT          |
| TRAg_19 | gggcggatatctcgag TCGATAGAGAGGCAGCAAGAG         | gcggtaccgggatcc TTAGGAATTATTTCTCCTAAGTGCAT       |
| TRAg_20 | gggcggatatctcgag ATCCTGCAGCCGCGAGAA            | gcggtaccgggatcc TTAAGAGCTGACCGAATACTCCC          |
| TRAg_25 | gggcggatatctcgag TCTGTATTCAAAAAATTAAATAACACATT | gcggtaccgggatcc TTACAAAGTTGAACCACCTTGA           |
| TRAg_26 | gggcggatatctcgag CCTTCACTTATAGATAAGTACGATGCT   | gcggtaccgggatcc TTA TATTTTTGAATTCTTCCACTGAA      |
| TRAg_27 | gggcggatatctcgag GATGCTCAGGGTGAGAACGT          | gcggtaccgggatcc TTATAGTGTGATACAACACTGTTTCTCTCCTC |
| TRAg_35 | gggcggatatctcgag ACCGTTTTAGAACCAGTGGAAG        | gcggtaccgggatcc TCATTTGGATGCATCCATATGT           |

<sup>a</sup> Lowercase letter of primer sequence indicates it is homologous to the vector sequence.

**TABLE S3** Summary of primers used for *E. coli* expression of five PvTRAGs

| Proteins | Forward primer (5' → 3') <sup>a</sup>                                             | Vector (Tag)        | Apparent molecular weights |
|----------|-----------------------------------------------------------------------------------|---------------------|----------------------------|
| TRAg_13  | GCTGCCCAAAGAAGGCA<br>TTAGACCCAGTTGGTCCACTG                                        | pEXP5 NT TOPO (His) | 36.5 kDa                   |
| TRAg_15  | GATGTATTACAATTAGTAATACCATCGGA<br>TCAAACCTTTTATTTTCATTAACAAATTGA                   | pEXP5 NT TOPO (His) | 35.2 kDa                   |
| TRAg_16  | gatccccaggaattccc TCACAAGGATGTTTCAGGATACC<br>atgcggccgctcgag TTATGCTGCATTTGGTGCTG | pGEX-4T-2 (GST)     | 65.7 kDa                   |
| TRAg_26  | CCTTCACTTATAGATAAGTACGATGCT<br>TTA TAT TTT TGA ATT CTT CCA CTG AAT CC             | pEXP5 NT TOPO (His) | 18.3 kDa                   |
| TRAg_29  | CCAAAACCTGCTCAGAACCT<br>TTACTTTCTAACTTTTTTGACCCATTG                               | pEXP5 NT TOPO (His) | 32.4 kDa                   |

<sup>a</sup> Lowercase letter of primer sequence indicates it is homologous to the vector sequence.

**TABLE S4** Motifs identified in the PvTRAg family using MEME

| Motif # | Length (aa) <sup>a</sup> | Amino acid sequence of motif                       |
|---------|--------------------------|----------------------------------------------------|
| 1       | 22                       | FNEWMESFI[NE]KWI[NS]EKQWNVWV                       |
| 2       | 22                       | WKNKKIMEWL[SM]S[DE]WKL[EK]EDEYW                    |
| 3       | 25                       | W[DN][DE]SQW[EK]EWIKTE[GL]KE[LF][MIL]Ex[DE]W[KE]KW |
| 4       | 22                       | WL[EQ][EK]KEKEWEEW[LI]KSM[EQ]NKW[MT]H              |
| 5       | 25                       | WKENEW[NK]NW[ML]KKLEE[DE]W[KE]xFNxS[LI]E           |
| 6       | 25                       | W[KN][EK]RIN[RK]EKE[EQ]Wx[KN]WV[KQ]xKEKLYIN        |
| 7       | 16                       | VSx[LI]SI[AST]L[FL]ILSSAFL                         |
| 8       | 16                       | [YF]NEN[MLI]DEEYKS[DN][IV][LY]KK                   |
| 9       | 12                       | W[KD]KWSKWK[ND][DE]KR                              |
| 10      | 24                       | PPKPVNDKDKD[DG]SNKTETK[DN]AKN[GT]                  |

<sup>a</sup>aa, amino acid.

## REFERENCES

- Bozdech Z, Mok S, Hu G, Imwong M, Jaidee A, Russell B, Ginsburg H, Nosten F, Day NP, White NJ, Carlton JM, Preiser PR.** 2008. The transcriptome of *Plasmodium vivax* reveals divergence and diversity of transcriptional regulation in malaria parasites. *Proc Natl Acad Sci U S A* **105**:16290–16295.
- Lu F, Li J, Wang B, Cheng Y, Kong DH, Cui L, Ha KS, Sattabongkot J, Tsuboi T, Han ET.** 2014. Profiling the humoral immune responses to *Plasmodium vivax* infection and identification of candidate immunogenic rhoptry-associated membrane antigen (RAMA). *J Proteomics* **102**:66–82.
- Chen JH, Jung JW, Wang Y, Ha KS, Lu F, Lim CS, Takeo S, Tsuboi T, Han ET.** 2010. Immunoproteomics profiling of blood stage *Plasmodium vivax* infection by high-throughput screening assays. *J Proteome Res* **9**:6479–6489.
